# Supplementary material for: Effect of Physical Activity on Metabolic Syndrome Markers in Adults with Type 2 Diabetes: A Systematic Review and Meta-Analysis
Source: MDPI journal article supplement (doi:10.3390/sports11050101), 2023-05-09
Supplement: s1 [file s1]

## S1: Search Strategy

### MEDLINE Complete (via EBSCOhost platform)

|                                                                                                                                                            |         |
|------------------------------------------------------------------------------------------------------------------------------------------------------------|---------|
| S63 S19 AND S33 AND S54 AND S61 Limiters - English Language                                                                                                | 569     |
| S62 S19 AND S33 AND S54 AND S61                                                                                                                            | 583     |
| S61 S55 OR S56 OR S57 OR S58 OR S59 OR S60                                                                                                                 | 307,434 |
| S60 MH "Randomized Controlled Trials as Topic+")                                                                                                           | 143,468 |
| S59 TI RCT OR AB RCT                                                                                                                                       | 51,283  |
| S58 TI "equivalence trial*" OR AB "equivalence trial"                                                                                                      | 470     |
| S57 TI "pragmatic clinical trial*" OR AB "pragmatic clinical trial"                                                                                        | 473     |
| S56 TI "randomised control* trial*" OR AB "randomised control* trial"                                                                                      | 47,660  |
| S55 TI "randomized control* trial*" OR AB "randomized control* trial"                                                                                      | 151,528 |
| S54 S34 OR S35 OR S36 OR S37 OR S38 OR S39 OR S40 OR S41 OR S42 OR S43 OR S44 OR S45 OR S46 OR S47 OR S48 OR S49 OR S50 OR S51 OR S52 OR S53 OR S54 OR S55 | 668,495 |
| S53 MH "Metabolic Syndrome")                                                                                                                               | 32,515  |
| S52 TI "waist-to-hip ratio" OR AB "waist-to-hip ratio"                                                                                                     | 5,867   |
| S51 TI "waist circumference" OR AB "waist circumference"                                                                                                   | 28,079  |
| S50 TI "glycosylated haemoglobin" OR AB "glycosylated haemoglobin"                                                                                         | 2,442   |
| S49 TI "glycosylated hemoglobin" OR AB "glycosylated hemoglobin"                                                                                           | 7,677   |
| S48 TI "glycated hemoglobin" OR AB "glycated hemoglobin"                                                                                                   | 8,702   |
| S47 TI "glycated haemoglobin" OR AB "glycated haemoglobin"                                                                                                 | 3,722   |
| S46 TI "low-density lipoprotein" OR AB "low-density lipoprotein"                                                                                           | 68,126  |
| S45 TI "high-density lipoprotein" OR AB "high-density lipoprotein"                                                                                         | 50,204  |
| S44 TI "high-density lipoprotein ratio" OR AB "high-density lipoprotein ratio"                                                                             | 304     |
| S43 TI cholesterol OR AB cholesterol                                                                                                                       | 244,707 |
| S42 TI triglyceride* OR AB triglyceride*                                                                                                                   | 114,461 |
| S41 TI "blood pressure" OR AB "blood pressure"                                                                                                             | 299,406 |
| S40 TI "cardiovascular syndrome" OR AB "cardiovascular syndrome"                                                                                           | 155     |
| S39 TI "metabolic cardiovascular" OR AB "metabolic cardiovascular"                                                                                         | 625     |
| S38 TI "cardiovascular risk factor*" OR AB "cardiovascular risk factor"                                                                                    | 35,464  |
| S37 TI cardiometabolic OR AB cardiometabolic                                                                                                               | 12,480  |
| S36 TI "syndrome X" OR AB "syndrome X"                                                                                                                     | 1,778   |
| S35 TI "metabolic X" OR AB "metabolic X"                                                                                                                   | 29      |
| S34 TI "metabolic syndrome" OR AB "metabolic syndrome"                                                                                                     | 52,162  |

|                                                                                                                       |         |
|-----------------------------------------------------------------------------------------------------------------------|---------|
| S33 S20 OR S21 OR S22 OR S23 OR S24 OR S25 OR S26 OR S27 OR S28 OR S29 OR S30 OR S31 OR S32                           | 201,169 |
| S32 (MH "Diabetes Mellitus, Type 2+")                                                                                 | 137,449 |
| S31 TI "stable diabet*" OR AB "stable diabet"                                                                         | 151     |
| S30 TI "late-onset diabet*" OR AB "late-onset diabet"                                                                 | 120     |
| S29 TI "adult* diabet*" OR AB "adult* diabet"                                                                         | 1,269   |
| S28 TI "non-insulin depend*" OR AB "non-insulin depend"                                                               | 10,941  |
| S27 TI "slow onset diabet*" OR AB "slow onset diabet"                                                                 | 4       |
| S26 TI "matur* onset diabet*" OR AB "matur* onset diabet"                                                             | 2,073   |
| S25 TI DM2 OR AB DM2                                                                                                  | 2,009   |
| S24 TI T2DM OR AB T2DM                                                                                                | 22,256  |
| S23 TI T2D OR AB T2D                                                                                                  | 10,798  |
| S22 TI NIDDM OR AB NIDDM                                                                                              | 6,953   |
| S21 TI "type II diabet*" OR AB "type II diabet"                                                                       | 9,958   |
| S20 TI "type 2 diabet*" OR AB "type 2 diabet"                                                                         | 136,731 |
| S19 S1 OR S2 OR S3 OR S4 OR S5 OR S6 OR S7 OR S8 OR S9 OR S10 OR S11 OR S12 OR S13 OR S14 OR S15 OR S16 OR S17 OR S18 | 787,343 |
| S18 (MH "Exercise+")                                                                                                  | 202,972 |
| S17 TI "endur* train*" OR AB "endur* train"                                                                           | 6,137   |
| S16 TI "active transport*" OR AB "active transport"                                                                   | 8,637   |
| S15 TI bicycl* OR AB bicycl*                                                                                          | 24,303  |
| S14 TI cycling OR AB cycling                                                                                          | 63,451  |
| S13 TI "strength train*" OR AB "strength train"                                                                       | 5,279   |
| S12 TI "cardio fitness" OR AB "cardio fitness"                                                                        | 9       |
| S11 TI "cardio train*" OR AB "cardio train"                                                                           | 9       |
| S10 TI jogging OR AB jogging                                                                                          | 1,681   |
| S9 TI running OR AB running                                                                                           | 61,085  |
| S8 TI pilate* OR AB pilate*                                                                                           | 585     |
| S7 TI yoga OR AB yoga                                                                                                 | 5,044   |
| S6 TI aerobic* OR AB aerobic*                                                                                         | 90,346  |
| S5 TI "resistance train*" OR AB "resistance train"                                                                    | 8,752   |
| S4 TI Sport* OR AB Sport*                                                                                             | 78,382  |
| S3 TI walk* OR AB walk*                                                                                               | 121,817 |
| S2 TI exercis* OR AB exercis*                                                                                         | 302,741 |
| S1 TI "Physical* Activ*" OR AB "Physical* Activ"                                                                      | 121,599 |

Limiters: English,

Explanatory notes: All keywords are searched using Title and Abstract. TI – Title search. AB – Abstract search. MH – Exact Subject heading search. The \* at the end of a MH term means this term has been exploded

## CINAHL (via EBSCOhost platform)

|                                                                                                                                                            |         |
|------------------------------------------------------------------------------------------------------------------------------------------------------------|---------|
| S63 S19 AND S33 AND S54 AND S61 Limiters - English Language                                                                                                | 393     |
| S62 S19 AND S33 AND S54 AND S61                                                                                                                            | 400     |
| S61 S57 OR S58 OR S59 OR S60                                                                                                                               | 186,992 |
| S60 (MH "Randomized Controlled Trials+")                                                                                                                   | 113,253 |
| S59 TI RCT OR AB RCT                                                                                                                                       | 22,155  |
| S58 TI "equivalence trial*" OR AB "equivalence trial"                                                                                                      | 191     |
| S57 TI "pragmatic clinical trial*" OR AB "pragmatic clinical trial"                                                                                        | 243     |
| S56 TI "randomised control* trial*" OR AB "randomised control* trial"                                                                                      | 25,410  |
| S55 TI "randomized control* trial*" OR AB "randomized control* trial"                                                                                      | 77,573  |
| S54 S34 OR S35 OR S36 OR S37 OR S38 OR S39 OR S40 OR S41 OR S42 OR S43 OR S44 OR S45 OR S46 OR S47 OR S48 OR S49 OR S50 OR S51 OR S52 OR S53 OR S54 OR S55 | 142,100 |
| S53 (MH "Metabolic Syndrome X+")                                                                                                                           | 13,675  |
| S52 TI "waist-to-hip ratio" OR AB "waist-to-hip ratio"                                                                                                     | 1,793   |
| S51 TI "waist circumference" OR AB "waist circumference"                                                                                                   | 10,511  |
| S50 TI "glycosylated haemoglobin" OR AB "glycosylated haemoglobin"                                                                                         | 586     |
| S49 TI "glycosylated hemoglobin" OR AB "glycosylated hemoglobin"                                                                                           | 2,368   |
| S48 TI "glycated hemoglobin" OR AB "glycated hemoglobin"                                                                                                   | 2,978   |
| S47 TI "glycated haemoglobin" OR AB "glycated haemoglobin"                                                                                                 | 999     |
| S46 TI "low-density lipoprotein" OR AB "low-density lipoprotein"                                                                                           | 12,322  |
| S45 TI "high-density lipoprotein" OR AB "high-density lipoprotein"                                                                                         | 10,575  |
| S44 TI "high-density lipoprotein ratio" OR AB "high-density lipoprotein ratio"                                                                             | 93      |
| S43 TI cholesterol OR AB cholesterol                                                                                                                       | 39,758  |
| S42 TI triglyceride* OR AB triglyceride*                                                                                                                   | 18,864  |
| S41 TI "blood pressure" OR AB "blood pressure"                                                                                                             | 70,243  |
| S40 TI "cardiovascular syndrome" OR AB "cardiovascular syndrome"                                                                                           | 18      |
| S39 TI "metabolic cardiovascular" OR AB "metabolic cardiovascular"                                                                                         | 113     |

|     |                                                                                                                   |         |
|-----|-------------------------------------------------------------------------------------------------------------------|---------|
| S38 | TI "cardiovascular risk factor*" OR AB "cardiovascular risk factor"                                               | 10,610  |
| S37 | TI cardiometabolic OR AB cardiometabolic                                                                          | 5,497   |
| S36 | TI "syndrome X" OR AB "syndrome X"                                                                                | 352     |
| S35 | TI "metabolic X" OR AB "metabolic X"                                                                              | 3       |
| S34 | TI "metabolic syndrome" OR AB "metabolic syndrome"                                                                | 15,198  |
| S33 | S20 OR S21 OR S22 OR S23 OR S24 OR S25 OR S26 OR S27 OR S28 OR S29 OR S30 OR S31 OR S32                           | 79,660  |
| S32 | (MH "Diabetes Mellitus, Type 2")                                                                                  | 63,135  |
| S31 | TI "stable diabet*" OR AB "stable diabet"                                                                         | 23      |
| S30 | TI "late-onset diabet*" OR AB "late-onset diabet"                                                                 | 21      |
| S29 | TI "adult* diabet*" OR AB "adult* diabet"                                                                         | 437     |
| S28 | TI "non-insulin depend*" OR AB "non-insulin depend"                                                               | 1,420   |
| S27 | TI "slow onset diabet*" OR AB "slow onset diabet"                                                                 | 2       |
| S26 | TI "matur* onset diabet*" OR AB "matur* onset diabet"                                                             | 454     |
| S25 | TI DM2 OR AB DM2                                                                                                  | 449     |
| S24 | TI T2DM OR AB T2DM                                                                                                | 6,210   |
| S23 | TI T2D OR AB T2D                                                                                                  | 3,293   |
| S22 | TI NIDDM OR AB NIDDM                                                                                              | 1,315   |
| S21 | TI "type II diabet*" OR AB "type II diabet"                                                                       | 1,948   |
| S20 | TI "type 2 diabet*" OR AB "type 2 diabet"                                                                         | 52,110  |
| S19 | S1 OR S2 OR S3 OR S4 OR S5 OR S6 OR S7 OR S8 OR S9 OR S10 OR S11 OR S12 OR S13 OR S14 OR S15 OR S16 OR S17 OR S18 | 290,206 |
| S18 | (MH "Physical Activity")                                                                                          | 42,894  |
| S17 | TI "endur* train*" OR AB "endur* train"                                                                           | 1,932   |
| S16 | TI "active transport*" OR AB "active transport"                                                                   | 532     |
| S15 | TI bicycl* OR AB bicycl*                                                                                          | 3,479   |
| S14 | TI cycling OR AB cycling                                                                                          | 7,938   |
| S13 | TI "strength train*" OR AB "strength train"                                                                       | 3,437   |
| S12 | TI "cardio fitness" OR AB "cardio fitness"                                                                        | 8       |
| S11 | TI "cardio train*" OR AB "cardio train"                                                                           | 9       |
| S10 | TI jogging OR AB jogging                                                                                          | 660     |
| S9  | TI running OR AB running                                                                                          | 15,986  |
| S8  | TI pilate* OR AB pilate*                                                                                          | 1,066   |
| S7  | TI yoga OR AB yoga                                                                                                | 7,325   |
| S6  | TI aerobic* OR AB aerobic*                                                                                        | 14,349  |

|    |                                                 |         |
|----|-------------------------------------------------|---------|
| S5 | TI "resistance train*" OR AB "resistance train" | 5,167   |
| S4 | TI Sport* OR AB Sport*                          | 48,940  |
| S3 | TI walk* OR AB walk*                            | 47,404  |
| S2 | TI exercis* OR AB exercis*                      | 123,607 |
| S1 | TI "Physical* Activ*" OR AB "Physical* Activ"   | 64,858  |

Limiters: English,

Explanatory notes: All keywords are searched using Title and Abstract. TI – Title search. AB – Abstract search. MH – Exact Subject heading search. The \* at the end of a MH term means this term has been exploded

## PSYCHINFO (Via EBSCOhost platform)

|     |                                                                                                                                                        |        |
|-----|--------------------------------------------------------------------------------------------------------------------------------------------------------|--------|
| S63 | S19 AND S33 AND S54 AND S62 Limiters – English                                                                                                         | 39     |
| S62 | S19 AND S33 AND S54 AND S62                                                                                                                            | 39     |
| S61 | S55 OR S56 OR S57 OR S58 OR S59 OR S60                                                                                                                 | 38,068 |
| S60 | DE "Randomized Controlled Trials" OR DE "Randomized Clinical Trials"                                                                                   | 851    |
| S59 | TI RCT OR AB RCT                                                                                                                                       | 8,245  |
| S58 | TI "equivalence trial*" OR AB "equivalence trial"                                                                                                      | 59     |
| S57 | TI "pragmatic clinical trial*" OR AB "pragmatic clinical trial"                                                                                        | 62     |
| S56 | TI "randomised control* trial*" OR AB "randomised control* trial"                                                                                      | 5,965  |
| S55 | TI "randomized control* trial*" OR AB "randomized control* trial"                                                                                      | 29,301 |
| S54 | S34 OR S35 OR S36 OR S37 OR S38 OR S39 OR S40 OR S41 OR S42 OR S43 OR S44 OR S45 OR S46 OR S47 OR S48 OR S49 OR S50 OR S51 OR S52 OR S53 OR S54 OR S55 | 34,205 |
| S53 | DE "Metabolic Syndrome"                                                                                                                                | 2,322  |
| S52 | TI "waist-to-hip ratio" OR AB "waist-to-hip ratio"                                                                                                     | 550    |
| S51 | TI "waist circumference" OR AB "waist circumference"                                                                                                   | 2,710  |
| S50 | TI "glycosylated haemoglobin" OR AB "glycosylated haemoglobin"                                                                                         | 81     |
| S49 | TI "glycosylated hemoglobin" OR AB "glycosylated hemoglobin"                                                                                           | 545    |
| S48 | TI "glycated hemoglobin" OR AB "glycated hemoglobin"                                                                                                   | 358    |
| S47 | TI "glycated haemoglobin" OR AB "glycated haemoglobin"                                                                                                 | 103    |
| S46 | TI "low-density lipoprotein" OR AB "low-density lipoprotein"                                                                                           | 1,715  |
| S45 | TI "high-density lipoprotein" OR AB "high-density lipoprotein"                                                                                         | 1,694  |
| S44 | TI "high-density lipoprotein ratio" OR AB "high-density lipoprotein ratio"                                                                             | 17     |
| S43 | TI cholesterol OR AB cholesterol                                                                                                                       | 8,234  |
| S42 | TI triglyceride* OR AB triglyceride*                                                                                                                   | 3,157  |
| S41 | TI "blood pressure" OR AB "blood pressure"                                                                                                             | 19,666 |

|     |                                                                                                                   |         |
|-----|-------------------------------------------------------------------------------------------------------------------|---------|
| S40 | TI "cardiovascular syndrome" OR AB "cardiovascular syndrome"                                                      | 5       |
| S39 | TI "metabolic cardiovascular" OR AB "metabolic cardiovascular"                                                    | 64      |
| S38 | TI "cardiovascular risk factor*" OR AB "cardiovascular risk factor"                                               | 2,279   |
| S37 | TI cardiometabolic OR AB cardiometabolic                                                                          | 1,116   |
| S36 | TI "syndrome X" OR AB "syndrome X"                                                                                | 61      |
| S35 | TI "metabolic X" OR AB "metabolic X"                                                                              | 1       |
| S34 | TI "metabolic syndrome" OR AB "metabolic syndrome"                                                                | 3,396   |
| S33 | S20 OR S21 OR S22 OR S23 OR S24 OR S25 OR S26 OR S27 OR S28 OR S29 OR S30 OR S31 OR S32                           | 9,368   |
| S32 | DE "Type 2 Diabetes" OR DE "Blood Sugar"                                                                          | 4,773   |
| S31 | TI "stable diabet*" OR AB "stable diabet"                                                                         | 5       |
| S30 | TI "late-onset diabet*" OR AB "late-onset diabet"                                                                 | 3       |
| S29 | TI "adult* diabet*" OR AB "adult* diabet"                                                                         | 99      |
| S28 | TI "non-insulin depend*" OR AB "non-insulin depend"                                                               | 207     |
| S27 | TI "slow onset diabet*" OR AB "slow onset diabet"                                                                 | 0       |
| S26 | TI "matur* onset diabet*" OR AB "matur* onset diabet"                                                             | 11      |
| S25 | TI DM2 OR AB DM2                                                                                                  | 143     |
| S24 | TI T2DM OR AB T2DM                                                                                                | 1,057   |
| S23 | TI T2D OR AB T2D                                                                                                  | 480     |
| S22 | TI NIDDM OR AB NIDDM                                                                                              | 96      |
| S21 | TI "type II diabet*" OR AB "type II diabet"                                                                       | 687     |
| S20 | TI "type 2 diabet*" OR AB "type 2 diabet"                                                                         | 7,151   |
| S19 | S1 OR S2 OR S3 OR S4 OR S5 OR S6 OR S7 OR S8 OR S9 OR S10 OR S11 OR S12 OR S13 OR S14 OR S15 OR S16 OR S17 OR S18 | 174,149 |
| S18 | DE "Physical Activity" OR DE "Actigraphy" OR DE "Exercise"                                                        | 45,176  |
| S17 | TI "endur* train*" OR AB "endur* train"                                                                           | 288     |
| S16 | TI "active transport*" OR AB "active transport"                                                                   | 447     |
| S15 | TI bicycl* OR AB bicycl*                                                                                          | 2,321   |
| S14 | TI cycling OR AB cycling                                                                                          | 5,192   |
| S13 | TI "strength train*" OR AB "strength train"                                                                       | 616     |
| S12 | TI "cardio fitness" OR AB "cardio fitness"                                                                        | 1       |
| S11 | TI "cardio train*" OR AB "cardio train"                                                                           | 3       |
| S10 | TI jogging OR AB jogging                                                                                          | 318     |
| S9  | TI running OR AB running                                                                                          | 15,994  |
| S8  | TI pilate* OR AB pilate*                                                                                          | 103     |

|    |                                                 |        |
|----|-------------------------------------------------|--------|
| S7 | TI yoga OR AB yoga                              | 2,913  |
| S6 | TI aerobic* OR AB aerobic*                      | 4,786  |
| S5 | TI "resistance train*" OR AB "resistance train" | 749    |
| S4 | TI Sport* OR AB Sport*                          | 35,076 |
| S3 | TI walk* OR AB walk*                            | 27,090 |
| S2 | TI exercis* OR AB exercis*                      | 68,383 |
| S1 | TI "Physical* Activ*" OR AB "Physical* Activ"   | 36,492 |

Limiters: English,

Explanatory notes: All keywords are searched using Title and Abstract. TI – Title search. AB – Abstract search. MH – Exact Subject heading search. The \* at the end of a MH term means this term has been exploded

### SPORTSDISCUS (via EBSCOhost platform)

|     |                                                                                                                                                        |        |
|-----|--------------------------------------------------------------------------------------------------------------------------------------------------------|--------|
| S63 | S19 AND S33 AND S56 AND S62                                                                                                                            | 33     |
| S62 | S19 AND S33 AND S56 AND S62                                                                                                                            | 33     |
| S61 | S57 OR S58 OR S59 OR S60 OR S61                                                                                                                        | 12,324 |
| S60 | TI RCT OR AB RCT                                                                                                                                       | 1,985  |
| S59 | TI "equivalence trial*" OR AB "equivalence trial"                                                                                                      | 10     |
| S58 | TI "pragmatic clinical trial*" OR AB "pragmatic clinical trial"                                                                                        | 17     |
| S57 | TI "randomised control* trial*" OR AB "randomised control* trial"                                                                                      | 2,048  |
| S56 | TI "randomized control* trial*" OR AB "randomized control* trial"                                                                                      | 9,702  |
| S55 | S34 OR S35 OR S36 OR S37 OR S38 OR S39 OR S40 OR S41 OR S42 OR S43 OR S44 OR S45 OR S46 OR S47 OR S48 OR S49 OR S50 OR S51 OR S52 OR S53 OR S54 OR S55 | 43,918 |
| S54 | DE "Metabolic Syndrome"                                                                                                                                | 1,557  |
| S53 | TI "waist-to-hip ratio" OR AB "waist-to-hip ratio"                                                                                                     | 411    |
| S51 | TI "waist circumference" OR AB "waist circumference"                                                                                                   | 2,467  |
| S50 | TI "glycosylated haemoglobin" OR AB "glycosylated haemoglobin"                                                                                         | 136    |
| S49 | TI "glycosylated hemoglobin" OR AB "glycosylated hemoglobin"                                                                                           | 143    |
| S48 | TI "glycated hemoglobin" OR AB "glycated hemoglobin"                                                                                                   | 182    |
| S47 | TI "glycated haemoglobin" OR AB "glycated haemoglobin"                                                                                                 | 62     |
| S46 | TI "low-density lipoprotein" OR AB "low-density lipoprotein"                                                                                           | 1,738  |
| S45 | TI "high-density lipoprotein" OR AB "high-density lipoprotein"                                                                                         | 1,868  |
| S44 | TI "high-density lipoprotein ratio" OR AB "high-density lipoprotein ratio"                                                                             | 10     |

|     |                                                                                                                   |         |
|-----|-------------------------------------------------------------------------------------------------------------------|---------|
| S43 | TI cholesterol OR AB cholesterol                                                                                  | 7,722   |
| S42 | TI triglyceride* OR AB triglyceride*                                                                              | 4,036   |
| S41 | TI "blood pressure" OR AB "blood pressure"                                                                        | 16,427  |
| S40 | TI "cardiovascular syndrome" OR AB "cardiovascular syndrome"                                                      | 3       |
| S39 | TI "metabolic cardiovascular" OR AB "metabolic cardiovascular"                                                    | 43      |
| S38 | TI "cardiovascular risk factor*" OR AB "cardiovascular risk factor*"                                              | 1,293   |
| S37 | TI cardiometabolic OR AB cardiometabolic                                                                          | 1,103   |
| S36 | TI "syndrome X" OR AB "syndrome X"                                                                                | 41      |
| S35 | TI "metabolic X" OR AB "metabolic X"                                                                              | 1       |
| S34 | TI "metabolic syndrome" OR AB "metabolic syndrome"                                                                | 2,574   |
| S33 | S20 OR S21 OR S22 OR S23 OR S24 OR S25 OR S26 OR S27 OR S28 OR S29 OR S30 OR S31 OR S32                           | 5,465   |
| S32 | DE "TYPE 2 diabetes"                                                                                              | 2,223   |
| S31 | TI "stable diabet*" OR AB "stable diabet*"                                                                        | 1       |
| S30 | TI "late-onset diabet*" OR AB "late-onset diabet*"                                                                | 0       |
| S29 | TI "adult* diabet*" OR AB "adult* diabet*"                                                                        | 25      |
| S28 | TI "non-insulin depend*" OR AB "non-insulin depend*"                                                              | 194     |
| S27 | TI "slow onset diabet*" OR AB "slow onset diabet*"                                                                | 0       |
| S26 | TI "matur* onset diabet*" OR AB "matur* onset diabet*"                                                            | 13      |
| S25 | TI DM2 OR AB DM2                                                                                                  | 46      |
| S24 | TI T2DM OR AB T2DM                                                                                                | 485     |
| S23 | TI T2D OR AB T2D                                                                                                  | 341     |
| S22 | TI NIDDM OR AB NIDDM                                                                                              | 78      |
| S21 | TI "type II diabet*" OR AB "type II diabet*"                                                                      | 333     |
| S20 | TI "type 2 diabet*" OR AB "type 2 diabet*"                                                                        | 4,580   |
| S19 | S1 OR S2 OR S3 OR S4 OR S5 OR S6 OR S7 OR S8 OR S9 OR S10 OR S11 OR S12 OR S13 OR S14 OR S15 OR S16 OR S17 OR S18 | 604,438 |
| S18 | DE "PHYSICAL activity"                                                                                            | 19,693  |
| S17 | TI "endur* train*" OR AB "endur* train*"                                                                          | 4,590   |
| S16 | TI "active transport*" OR AB "active transport*"                                                                  | 405     |
| S15 | TI bicycl* OR AB bicycl*                                                                                          | 24,141  |
| S14 | TI cycling OR AB cycling                                                                                          | 29,354  |
| S13 | TI "strength train*" OR AB "strength train*"                                                                      | 8,600   |
| S12 | TI "cardio fitness" OR AB "cardio fitness"                                                                        | 44      |
| S11 | TI "cardio train*" OR AB "cardio train*"                                                                          | 69      |



|     |                                                 |         |
|-----|-------------------------------------------------|---------|
| S10 | TI jogging OR AB jogging                        | 2,081   |
| S9  | TI running OR AB running                        | 53,282  |
| S8  | TI pilate* OR AB pilate*                        | 1,763   |
| S7  | TI yoga OR AB yoga                              | 9,482   |
| S6  | TI aerobic* OR AB aerobic*                      | 21,248  |
| S5  | TI "resistance train*" OR AB "resistance train" | 7,547   |
| S4  | TI Sport* OR AB Sport*                          | 323,696 |
| S3  | TI walk* OR AB walk*                            | 34,990  |
| S2  | TI exercis* OR AB exercis*                      | 143,863 |
| S1  | TI "Physical* Activ*" OR AB "Physical* Activ"   | 49,673  |

Limiters: English,

Explanatory notes: All keywords are searched using Title and Abstract. TI – Title search. AB – Abstract search. MH – Exact Subject heading search. The \* at the end of a MH term means this term has been exploded

### SOCINDEX (via EBSCOhost platform)

|     |                                                                                                                                                 |       |
|-----|-------------------------------------------------------------------------------------------------------------------------------------------------|-------|
| S62 | S19 AND S33 AND S53 AND S60                                                                                                                     | 5     |
| S61 | S19 AND S33 AND S53 AND S60                                                                                                                     | 5     |
| S60 | S54 OR S55 OR S56 OR S57 OR S58 OR S59                                                                                                          | 5,679 |
| S59 | DE "RANDOMIZED controlled trials"                                                                                                               | 2,573 |
| S58 | TI RCT OR AB RCT                                                                                                                                | 799   |
| S57 | TI "equivalence trial*" OR AB "equivalence trial"                                                                                               | 3     |
| S56 | TI "pragmatic clinical trial*" OR AB "pragmatic clinical trial"                                                                                 | 20    |
| S55 | TI "randomised control* trial*" OR AB "randomised control* trial"                                                                               | 636   |
| S54 | TI "randomized control* trial*" OR AB "randomized control* trial"                                                                               | 3,456 |
| S53 | S34 OR S35 OR S36 OR S37 OR S38 OR S39 OR S40 OR S41 OR S42 OR S43 OR S44 OR S45 OR S46 OR S47 OR S48 OR S49 OR S50 OR S51 OR S52 OR S53 OR S54 | 4,254 |
| S52 | TI "waist-to-hip ratio" OR AB "waist-to-hip ratio"                                                                                              | 90    |
| S51 | TI "waist circumference" OR AB "waist circumference"                                                                                            | 294   |
| S50 | TI "glycosylated haemoglobin" OR AB "glycosylated haemoglobin"                                                                                  | 12    |
| S49 | TI "glycosylated hemoglobin" OR AB "glycosylated hemoglobin"                                                                                    | 114   |
| S48 | TI "glycated hemoglobin" OR AB "glycated hemoglobin"                                                                                            | 34    |
| S47 | TI "glycated haemoglobin" OR AB "glycated haemoglobin"                                                                                          | 2     |

|     |                                                                                                                   |        |
|-----|-------------------------------------------------------------------------------------------------------------------|--------|
| S46 | TI "low-density lipoprotein" OR AB "low-density lipoprotein"                                                      | 193    |
| S45 | TI "high-density lipoprotein" OR AB "high-density lipoprotein"                                                    | 262    |
| S44 | TI "high-density lipoprotein ratio" OR AB "high-density lipoprotein ratio"                                        | 1      |
| S43 | TI cholesterol OR AB cholesterol                                                                                  | 1,32   |
| S42 | TI triglyceride* OR AB triglyceride*                                                                              | 30     |
| S41 | TI "blood pressure" OR AB "blood pressure"                                                                        | 2,517  |
| S40 | TI "cardiovascular syndrome" OR AB "cardiovascular syndrome"                                                      | 362    |
| S39 | TI "metabolic cardiovascular" OR AB "metabolic cardiovascular"                                                    | 5      |
| S38 | TI "cardiovascular risk factor*" OR AB "cardiovascular risk factor*"                                              | 383    |
| S37 | TI cardiometabolic OR AB cardiometabolic                                                                          | 86     |
| S36 | TI "syndrome X" OR AB "syndrome X"                                                                                | 10     |
| S35 | TI "metabolic X" OR AB "metabolic X"                                                                              | 41     |
| S34 | TI "metabolic syndrome" OR AB "metabolic syndrome"                                                                | 243    |
| S33 | S20 OR S21 OR S22 OR S23 OR S24 OR S25 OR S26 OR S27 OR S28 OR S29 OR S30 OR S31 OR S32                           | 2,296  |
| S32 | DE "DIABETES"                                                                                                     | 1,613  |
| S31 | TI "stable diabet*" OR AB "stable diabet*"                                                                        | 0      |
| S30 | TI "late-onset diabet*" OR AB "late-onset diabet*"                                                                | 1      |
| S29 | TI "adult* diabet*" OR AB "adult* diabet*"                                                                        | 12     |
| S28 | TI "non-insulin depend*" OR AB "non-insulin depend*"                                                              | 70     |
| S27 | TI "slow onset diabet*" OR AB "slow onset diabet*"                                                                | 0      |
| S26 | TI "matur* onset diabet*" OR AB "matur* onset diabet*"                                                            | 5      |
| S25 | TI DM2 OR AB DM2                                                                                                  | 5      |
| S24 | TI T2DM OR AB T2DM                                                                                                | 44     |
| S23 | TI T2D OR AB T2D                                                                                                  | 18     |
| S22 | TI NIDDM OR AB NIDDM                                                                                              | 41     |
| S21 | TI "type II diabet*" OR AB "type II diabet*"                                                                      | 69     |
| S20 | TI "type 2 diabet*" OR AB "type 2 diabet*"                                                                        | 825    |
| S19 | S1 OR S2 OR S3 OR S4 OR S5 OR S6 OR S7 OR S8 OR S9 OR S10 OR S11 OR S12 OR S13 OR S14 OR S15 OR S16 OR S17 OR S18 | 59,912 |
| S18 | DE "PHYSICAL fitness" OR DE "SPORTS"                                                                              | 5,860  |
| S17 | TI "endur* train*" OR AB "endur* train*"                                                                          | 12     |

|     |                                                 |        |
|-----|-------------------------------------------------|--------|
| S16 | TI "active transport*" OR AB "active transport" | 52     |
| S15 | TI bicycl* OR AB bicycl*                        | 958    |
| S14 | TI cycling OR AB cycling                        | 595    |
| S13 | TI "strength train*" OR AB "strength train"     | 81     |
| S12 | TI "cardio fitness" OR AB "cardio fitness"      | 9      |
| S11 | TI "cardio train*" OR AB "cardio train"         | 1      |
| S10 | TI jogging OR AB jogging                        | 86     |
| S9  | TI running OR AB running                        | 5,240  |
| S8  | TI pilate* OR AB pilate*                        | 29     |
| S7  | TI yoga OR AB yoga                              | 423    |
| S6  | TI aerobic* OR AB aerobic*                      | 432    |
| S5  | TI "resistance train*" OR AB "resistance train" | 103    |
| S4  | TI Sport* OR AB Sport*                          | 17,267 |
| S3  | TI walk* OR AB walk*                            | 8,472  |
| S2  | TI exercis* OR AB exercis*                      | 24,194 |
| S1  | TI "Physical* Activ*" OR AB "Physical* Activ"   | 5,428  |

Limiters: English,

Explanatory notes: All keywords are searched using Title and Abstract. TI – Title search. AB – Abstract search. MH – Exact Subject heading search. The \* at the end of a MH term means this term has been exploded

### EMBASE SEARCH (Embase Database on the Embase platform)

|     |                                                                                 |              |
|-----|---------------------------------------------------------------------------------|--------------|
| #63 | #19 AND #33 AND #54 AND #61 AND [humans]/lim AND [english]/lim AND [embase]/lim | <b>1,148</b> |
| #62 | #19 AND #33 AND #54 AND #61                                                     | 1,432        |
| #61 | #55 OR #56 OR #57 OR #58 OR #59 OR #60                                          | 785,271      |
| #60 | 'randomized controlled trial'/exp                                               | 641569       |
| #59 | 'equivalence trial*':ab,ti                                                      | 593          |
| #58 | rct:ab,ti                                                                       | 40659        |
| #57 | 'pragmatic clinical trial*':ab,ti                                               | 612          |
| #56 | 'randomised control* trial*':ab,ti                                              | 62894        |
| #55 | 'randomized control* trial*':ab,ti                                              | 197737       |

|     |                                                                                                                                          |         |
|-----|------------------------------------------------------------------------------------------------------------------------------------------|---------|
| #54 | #34 OR #35 OR #36 OR #37 OR #38 OR #39 OR #40 OR #41 OR #42 OR #43 OR #44 OR #45 OR #46 OR #47 OR #48 OR #49 OR #50 OR #51 OR #52 OR #53 | 948,377 |
| #53 | 'metabolic syndrome x'/exp                                                                                                               | 85889   |
| #52 | 'waist-to-hip ratio':ab,ti                                                                                                               | 7983    |
| #51 | 'waist circumference':ab,ti                                                                                                              | 45299   |
| #50 | 'glycosylated haemoglobin':ab,ti                                                                                                         | 3281    |
| #49 | 'glycosylated hemoglobin':ab,ti                                                                                                          | 10319   |
| #48 | 'glycated hemoglobin':ab,ti                                                                                                              | 11843   |
| #47 | 'glycated haemoglobin':ab,ti                                                                                                             | 5005    |
| #46 | 'low-density lipoprotein':ab,ti                                                                                                          | 83106   |
| #45 | 'high-density lipoprotein':ab,ti                                                                                                         | 61718   |
| #44 | 'high-density lipoprotein ratio':ab,ti                                                                                                   | 6364    |
| #43 | cholesterol:ab,ti                                                                                                                        | 329794  |
| #42 | triglyceride*:ab,ti                                                                                                                      | 164488  |
| #41 | 'blood pressure':ab,ti                                                                                                                   | 432545  |
| #40 | 'cardiovascular syndrome':ab,ti                                                                                                          | 184     |
| #39 | 'metabolic cardiovascular':ab,ti                                                                                                         | 902     |
| #38 | 'cardiovascular risk factor*':ab,ti                                                                                                      | 56048   |
| #37 | cardiometabolic:ab,ti                                                                                                                    | 20597   |
| #36 | 'syndrome x':ab,ti                                                                                                                       | 2339    |
| #35 | 'metabolic x':ab,ti                                                                                                                      | 41      |
| #34 | 'metabolic syndrome':ab,ti                                                                                                               | 81889   |
| #33 | #20 OR #21 OR #22 OR #23 OR #25 OR #26 OR #27 OR #28 OR #29 OR #30 OR #31 OR #32                                                         | 323468  |
| #32 | 'non insulin dependent diabetes mellitus'/exp                                                                                            | 270632  |
| #31 | 'stable diabet*':ab,ti                                                                                                                   | 222     |
| #30 | 'late-onset diabet*':ab,ti                                                                                                               | 158     |
| #29 | 'adult* diabet*':ab,ti                                                                                                                   | 1939    |

|     |                                                                                                                   |         |
|-----|-------------------------------------------------------------------------------------------------------------------|---------|
| #28 | 'non-insulin depend*':ab,ti                                                                                       | 12718   |
| #27 | 'slow onset diabet*':ab,ti                                                                                        | 5       |
| #26 | 'matur* onset diabet*':ab,ti                                                                                      | 2936    |
| #25 | dm2:ab,ti                                                                                                         | 4524    |
| #24 | t2dm:ab,ti                                                                                                        | 39782   |
| #23 | t2d:ab,ti                                                                                                         | 20958   |
| #22 | niddm:ab,ti                                                                                                       | 802     |
| #21 | 'type ii diabet*':ab,ti                                                                                           | 15538   |
| #20 | 'type 2 diabet*':ab,ti                                                                                            | 211853  |
| #19 | #1 OR #2 OR #3 OR #4 OR #5 OR #6 OR #7 OR #8 OR #9 OR #10 OR #11 OR #12 OR #13 OR #14 OR #15 OR #16 OR #17 OR #18 | 1171518 |
| #18 | 'physical activity'/exp                                                                                           | 442340  |
| #17 | 'endur* train*':ab,ti                                                                                             | 7753    |
| #16 | 'active transport*':ab,ti                                                                                         | 9667    |
| #15 | bicycl*:ab,ti                                                                                                     | 33305   |
| #14 | cycling:ab,ti                                                                                                     | 69296   |
| #13 | 'strength train*':ab,ti                                                                                           | 6758    |
| #12 | 'cardio fitness':ab,ti                                                                                            | 14      |
| #11 | 'cardio train*':ab,ti                                                                                             | 21      |
| #10 | jogging:ab,ti                                                                                                     | 2181    |
| #9  | running:ab,ti                                                                                                     | 77445   |
| #8  | pilate*:ab,ti                                                                                                     | 890     |
| #7  | yoga:ab,ti                                                                                                        | 7291    |
| #6  | aerobic*:ab,ti                                                                                                    | 109708  |
| #5  | 'resistance train*':ab,ti                                                                                         | 10434   |
| #4  | sport*:ab,ti                                                                                                      | 105531  |
| #3  | walk*:ab,ti                                                                                                       | 172985  |
| #2  | exercis*:ab,ti                                                                                                    | 412241  |
| #1  | 'physical* activ*':ab,ti                                                                                          | 165064  |

Limiters: Human, English and Embase database only (not Medline)  
:ab – abstract, :ti – title /de – index term /exp – exploded index term

## CoCHRANE (CENTRAL)

460

ID Search

#1 "Physical Activity":ti,ab

#2 exercise:ti,ab

#3 walk\*:ti,ab

#4 sport\*:ti,ab

#5 "resistance training":ti,ab

#6 aerobic:ti,ab

#7 yoga:ti,ab

#8 pilate\*:ti,ab

#9 running:ti,ab

#10 jogging:ti,ab

#11 "cardio training":ti,ab

#12 "cardio fitness":ti,ab

#13 "strength training":ti,ab

#14 cycling:ti,ab

#15 bicycling:ti,ab

#16 "active transport":ti,ab

#17 "endurance training":ti,ab

#18 MH "physical Activity"

#19 #1 OR #2 OR #3 OR #4 OR #5 OR #6 OR #7 OR #8 OR #9 OR #10 OR #11 OR #12 OR #13 OR #14 OR #15 OR #16 OR #17 OR #18

#20 "type 2 diabetes":ti,ab

#21 "type II diabetes":ti,ab

#22 NIDDM:ti,ab

#23 T2D:ti,ab  
#24 T2DM:ti,ab  
#25 DM2:ti,ab  
#26 "maturity onset diabetes":ti,ab  
#27 "slow onset diabetes":ti,ab  
#28 "non-insulin dependent":ti,ab  
#29 "adult diabetes":ti,ab  
#30 "late-onset diabetes":ti,ab  
#31 "stable diabetes":ti,ab  
#32 MH diabetes  
#33 #20 OR #21 OR #22 OR #23 OR #24 OR #25 OR #26 OR #27 OR #28 OR #29 OR #30 OR #31 OR #32  
#34 "metabolic syndrome":ti,ab  
#35 "metabolic X":ti,ab  
#36 "syndrome X":ti,ab  
#37 cardiometabolic:ti,ab  
#38 "cardiovascular risk factors":ti,ab  
#39 "metabolic cardiovascular":ti,ab  
#40 "cardiovascular syndrome":ti,ab  
#41 "blood pressure":ti,ab  
#42 triglycerides:ti,ab  
#43 cholesterol:ti,ab  
#44 "high-density lipoprotein ratio":ti,ab  
#45 "high -density lipoprotein":ti,ab  
#46 "low-density lipoprotein":ti,ab  
#47 "glycated haemoglobin":ti,ab  
#48 "glycated hemoglobin":ti,ab  
#49 "glycosylated haemoglobin":ti,ab  
#50 "waist circumference":ti,ab  
#51 "waist-to-hip ratio":ti,ab  
#52 MH "metabolic syndrome"

#53 #34 OR #35 OR #36 OR #37 OR #38 OR #39 OR #40 OR #41 OR #42 OR #43 OR #44 OR #45 OR #46 OR #47 OR #48 OR #49 OR #50 OR #51  
OR #52  
#54 "randomized controlled trial":ti,ab  
#55 "randomised controlled trial":ti,ab  
#56 "pragmatic clinical trial":ti,ab  
#57 "equivalence trial":ti,ab  
#58 RCT:ti,ab  
#59 MH "randomized controlled trial"  
#60 #54 OR #55 OR #56 OR #57 OR #58 OR #59  
#61 #19 AND #33 AND #53 AND #60



## S2. Forest plot for studies involving aerobic exercises

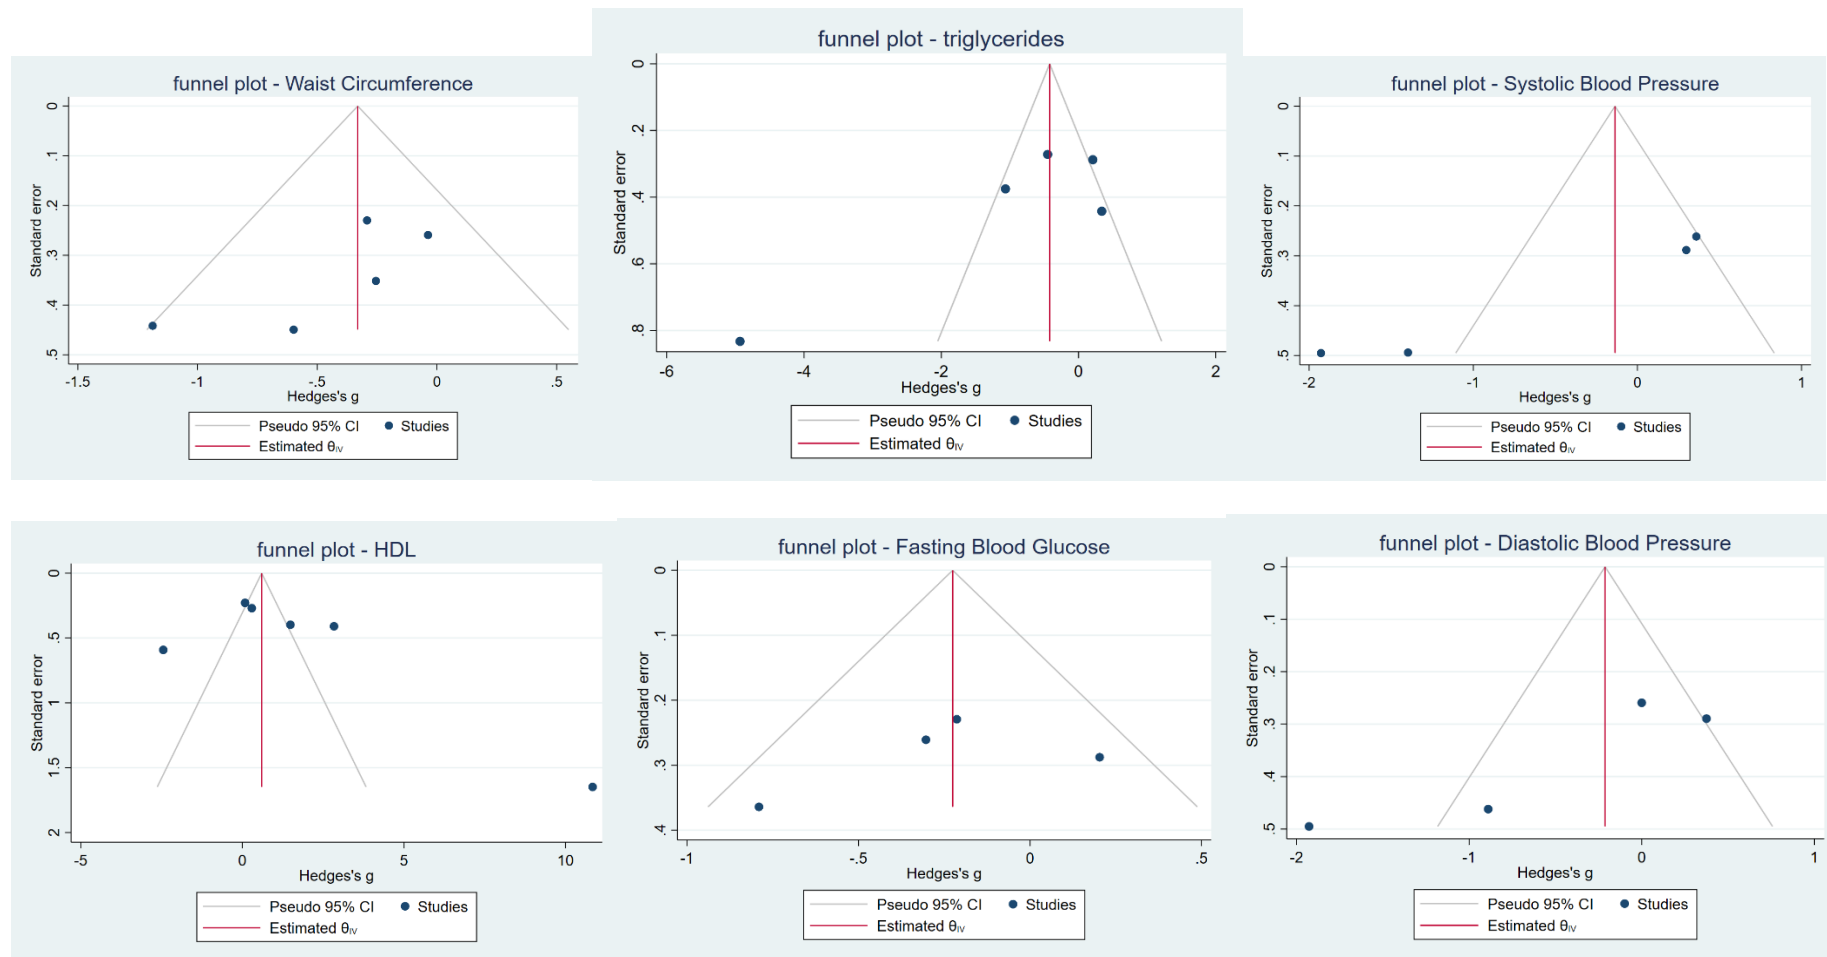

$\theta$  is the odds of a positive outcome under the treatment

### S3. Forest plot for studies involving resistance exercises

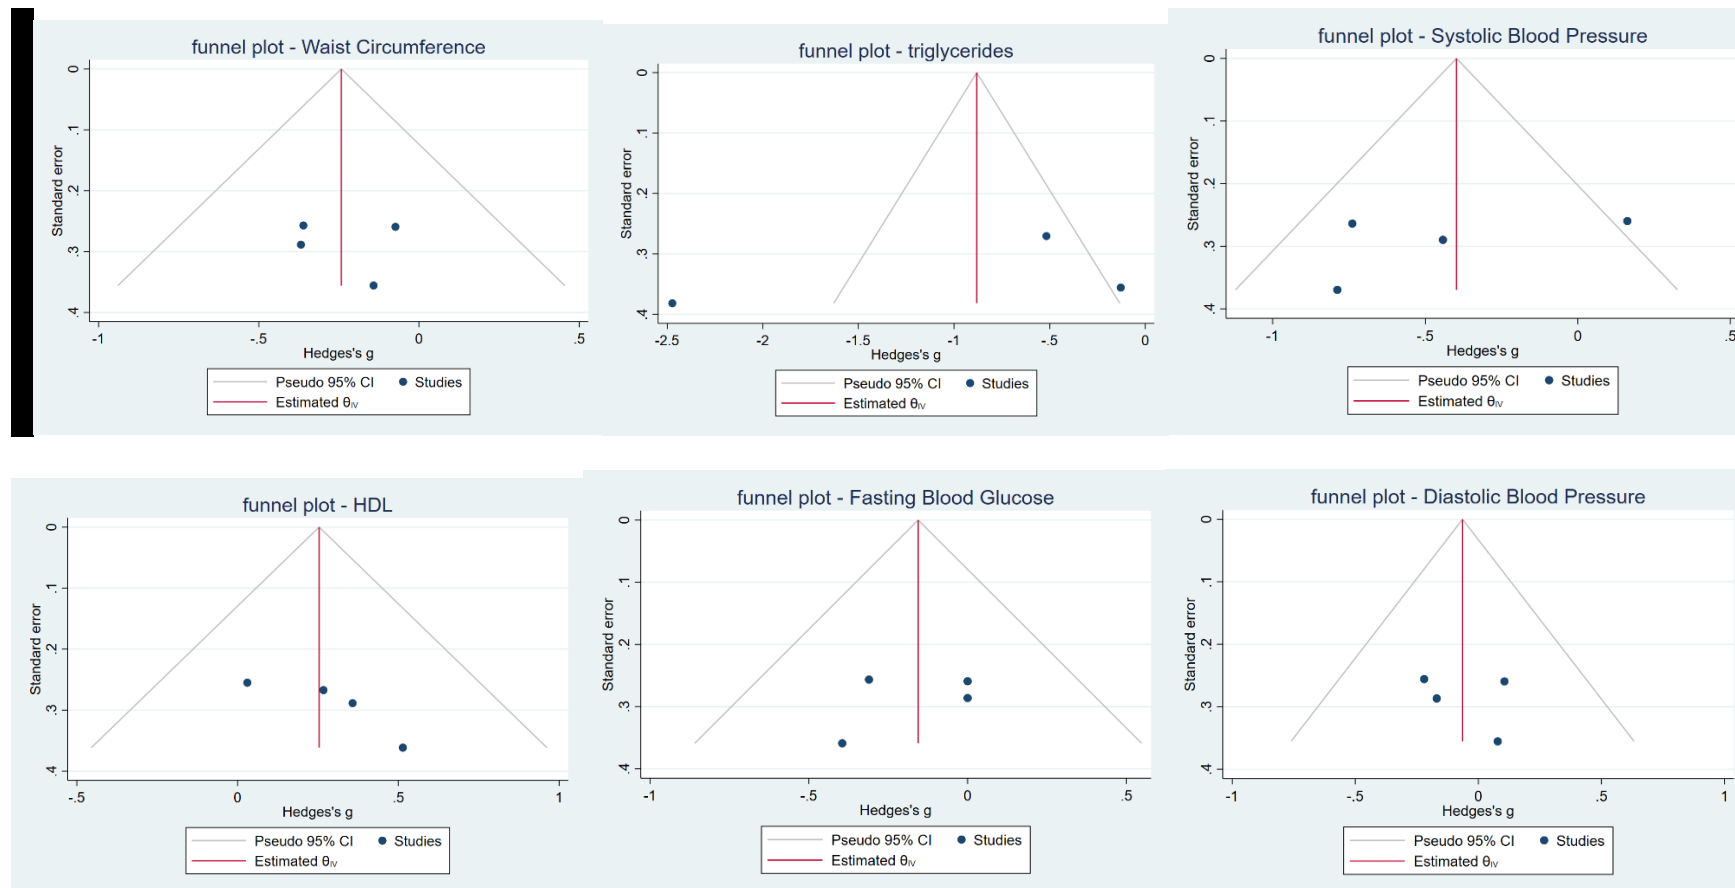

$\theta$  is the odds of a positive outcome under the treatment

#### S4: Effect of aerobic exercise on additional MetS markers in T2DM

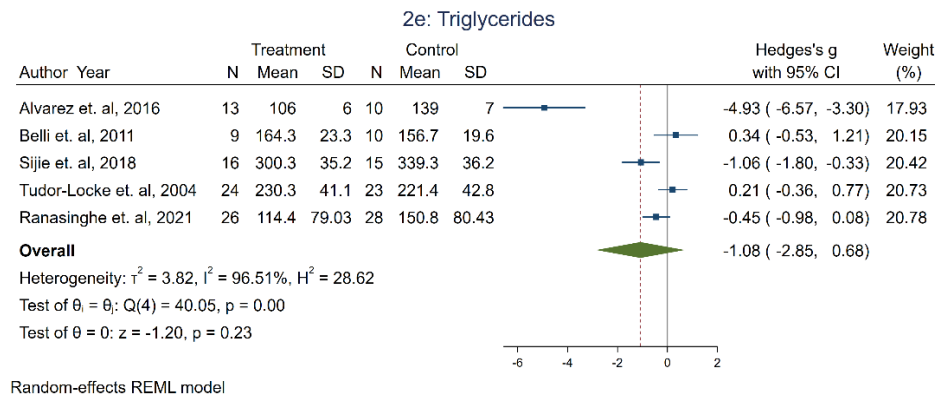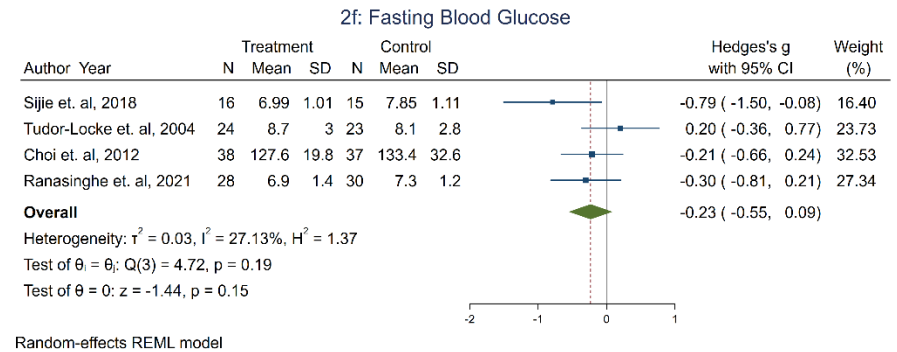

Effect of aerobic exercise on MetS markers in T2DM. Data are reported as Hedge's G (effect size) and 95% confidence interval (CI). The diamond at the bottom presents the overall effect. The plotted squares denote effect sizes, and the whiskers denote their 95% CIs 2, 5, 22, 23, 7, 18.

## S5: Effect of resistance exercise on MetS markers in T2DM

3a: High-Density Lipoprotein

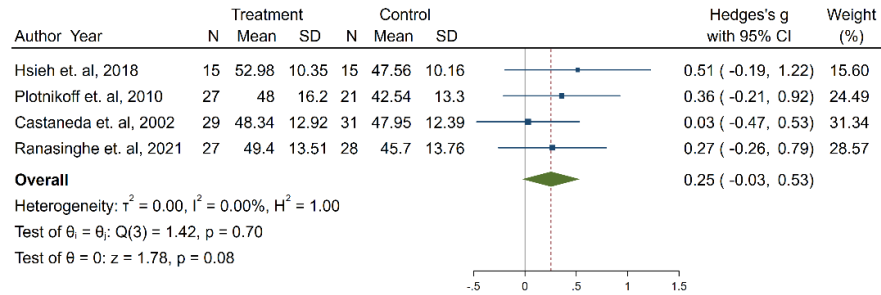

Random-effects REML model

3c: Systolic Blood Pressure

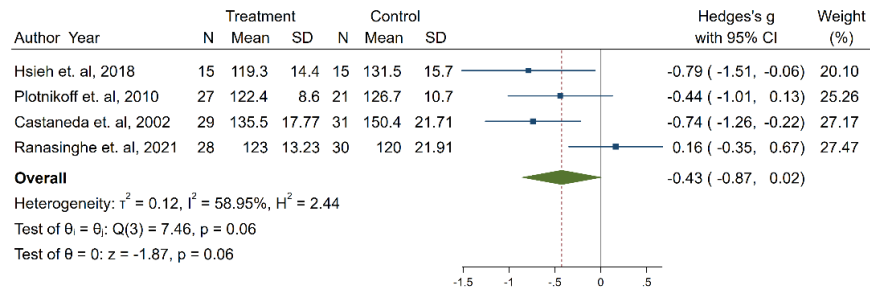

Random-effects REML model

3b: Waist Circumference

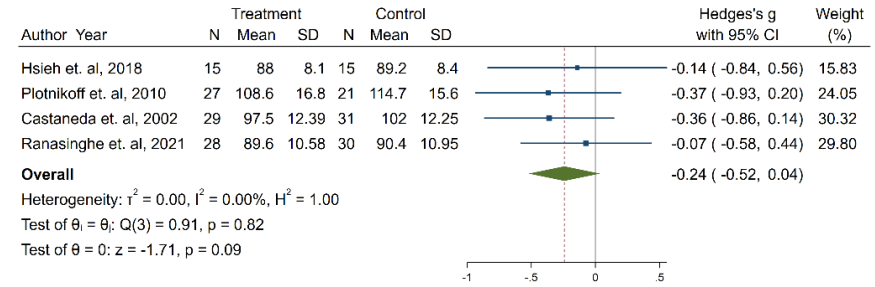

Random-effects REML model

3d: Diastolic Blood Pressure

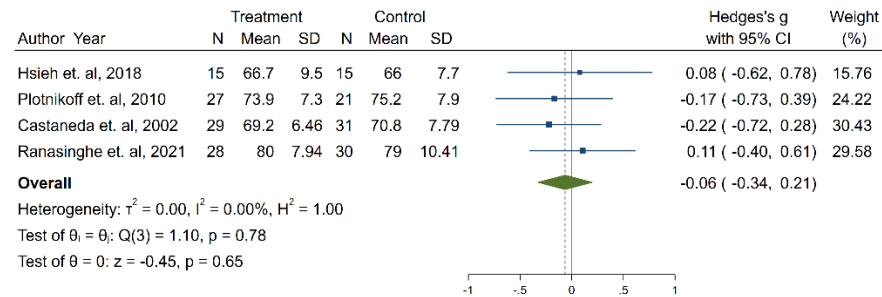

Random-effects REML model

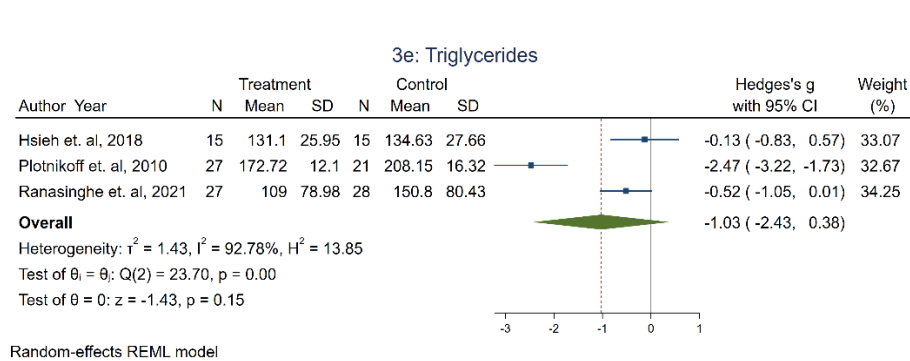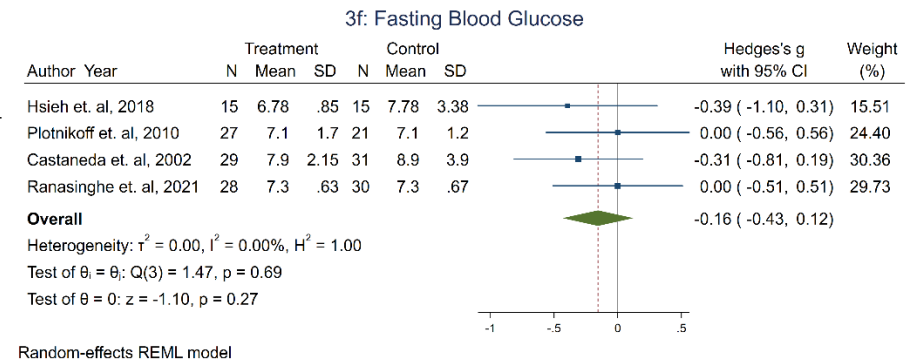

Effect of resistance exercise on MetS markers in T2DM. Data are reported as Hedge's G (effect size) and 95% confidence interval (CI). The diamond at the bottom presents the overall effect. The plotted squares denote effect sizes, and the whiskers denote their 95% CIs 13, 17, 18, 6.

S6: characteristics of studies included in the review

| Study author, year          | Study details (aim, design, setting, country)                                                                                                                                                                     | Sample characteristics (population, sample size)                                                                                                                       | PA program description                                                                                                                                              | Endpoints                                                                                                                                                             |
|-----------------------------|-------------------------------------------------------------------------------------------------------------------------------------------------------------------------------------------------------------------|------------------------------------------------------------------------------------------------------------------------------------------------------------------------|---------------------------------------------------------------------------------------------------------------------------------------------------------------------|-----------------------------------------------------------------------------------------------------------------------------------------------------------------------|
| Argurs-Collins et. al, 1997 | To evaluate a weight loss and exercise program designed to improve T2DM management in older African Americans.<br>RCT, parallel group.<br>Clinical/community setting.<br>USA.                                     | African American men and women aged 55-59 years and with T2DM.<br>N = 64 (IG = 32, CG = 32)                                                                            | 5-min warm-up, 20-min low-impact aerobic activity, and 5-min cool-down exercises.<br>30 mins per session, at least 3x per week for 6 months.<br>Moderate intensity. | BMI ( $p < 0.05$ ) *<br>HbA1c ( $p < 0.05$ ) *<br>DBP ( $p < 0.05$ ) *<br><br>WHR<br>DBP, TC, HDL, LDL, TG.                                                           |
| Alvarez et. al, 2016        | To investigate the effects of low-volume, high intensity interval training on cardiometabolic risk and exercise capacity in women with T2DM.<br>RCT, parallel group.<br>Clinical setting.<br>Chile.               | Adult overweight or obese (BMI between 25 and 35kg/m <sup>2</sup> ) adult women with established diagnosis of T2DM for at least 12 months<br>N = 23 (IG = 13, CG = 10) | Participants jog/run and walking.<br>3x per week for 16 weeks.<br>Low and high-intensity exercise.                                                                  | FBG ( $p < 0.05$ ) *<br>HbA1c ( $p < 0.05$ ) *<br>SBP ( $p < 0.05$ ) *<br>TG ( $p < 0.05$ ) *<br>BMI ( $p < 0.05$ ) *<br>WC ( $p < 0.05$ ) *<br><br>DBP, LDL, TC, HDL |
| Balducci et. al, 2010       | To assess the efficacy of an intensive exercise intervention strategy in improving PA, HbA1c, and other cardiovascular risk factors in patients with T2DM.<br>RCT, parallel group.<br>Clinical setting.<br>Italy. | Patients with T2DM<br>International Diabetes Federation (IDF) criteria for metabolic syndrome.<br>N = 606 (IG = 303, CG = 303).                                        | Two supervised sessions of progressive mixed (aerobic and resistance) training.<br>150 minutes per week for 12 months.<br>Moderate intensity.                       | HbA1c ( $p < 0.05$ ) *<br>SBP ( $p < 0.05$ ) *<br>DBP ( $p < 0.05$ ) *<br>HDL ( $p < 0.05$ ) *<br>LDL ( $p < 0.05$ ) *<br>WC ( $p < 0.05$ ) *<br><br>BMI, TC, TG      |

|                        |                                                                                                                                                                                                                                                 |                                                                                                                       |                                                                                                                                                                           |                                                                                                                            |
|------------------------|-------------------------------------------------------------------------------------------------------------------------------------------------------------------------------------------------------------------------------------------------|-----------------------------------------------------------------------------------------------------------------------|---------------------------------------------------------------------------------------------------------------------------------------------------------------------------|----------------------------------------------------------------------------------------------------------------------------|
| Bassi et. al, 2016     | To investigate the impact of concurrent aerobic and resistance training programs on metabolic profile, glycaemic control, and exercise capacity in patients with T2DM.<br>RCT, parallel group.<br>Laboratory setting.<br>Brazil.                | patients with T2DM and being sedentary for at least 6 months<br>N = 41 (IG = 21, CG = 20)                             | Supervised sessions including 5-min warm-up, 60-min CART training, and 5-min cool down.<br>Session lasted 1 hour 10 mins for 12 weeks<br>Moderate intensity combined      | HbA1c ( $p < 0.005$ ) *<br>TC ( $p < 0.005$ ) *<br>SBP ( $p < 0.005$ ) *<br>WC ( $p < 0.005$ ) *<br><br>BMI, LDL, HDL, DBP |
| Belli et. al, 2011     | To analyse the effects of overground walking training at ventilatory threshold velocity on glycaemic control, body composition, physical fitness, and lipid profile in women with T2DM.<br>RCT, parallel group.<br>Clinical setting.<br>Brazil. | Housewives who are non-smokers and inactive, and have T2DM.<br>N = 41 (IG = 21, CG = 20).                             | Supervised walking exercise including stretching exercise.<br>20-60 mins per session for 12 weeks.<br>Moderate intensity.                                                 | HbA1c ( $p < 0.005$ ) *<br>BMI ( $p < 0.005$ ) *<br><br>FBG, SBP, DBP, TC, HDL, LDL, TG, WC                                |
| Castaneda et. al, 2002 | To determine the efficacy of high-intensity progressive resistance training (PRT) on glycaemic control in older adults with T2DM.<br>RCT, parallel group.<br>Clinical setting.<br>USA.                                                          | Community-dwelling Latinos >55 years of age and have T2DM of at least 3 years duration.<br>N = 62 (IG = 31, CG = 31). | Supervised session consisting of 5-min warm-up, 35-min PRT, and 5-min cool-down<br>45 mins per session, 3x per week for 16 weeks.<br>High intensity, resistance training. | HbA1c ( $p < 0.001$ ) *<br>SBP ( $p < 0.001$ ) *<br><br>FBG, DBP, HDL, LDL, WC                                             |

|                      |                                                                                                                                                                                                                                                                                                                                              |                                                                                                                                                  |                                                                                                                                                                                      |                                                                                                                        |
|----------------------|----------------------------------------------------------------------------------------------------------------------------------------------------------------------------------------------------------------------------------------------------------------------------------------------------------------------------------------------|--------------------------------------------------------------------------------------------------------------------------------------------------|--------------------------------------------------------------------------------------------------------------------------------------------------------------------------------------|------------------------------------------------------------------------------------------------------------------------|
| Choi et. al, 2012    | To examine the effects of exercise on sRAGE and its association with diverse cardiovascular risk factors and indicators of atherosclerosis in patients with T2DM.<br>RCT, parallel group.<br>Home setting.<br>Korea.                                                                                                                         | Women with T2DM with a stable body weight and sedentary.<br>N = 75 (IG = 38, CG = 37)                                                            | Unsupervised walking at moderate exercise capacity.<br>60 mins per session, 5x per week for 12 weeks.<br>Moderate intensity                                                          | SBP ( $p < 0.05$ ) *<br>WC ( $p < 0.001$ ) *<br>HbA1c ( $p < 0.05$ ) *<br>FBG ( $p < 0.05$ ) *<br><br>TC, TG, HDL, LDL |
| Church et. al, 2010  | To examine the effects of aerobic training alone, resistance training alone, and a combination of both on Hb1Ac in individuals with T2DM.<br>RCT, parallel group. Clinical setting.<br>USA.                                                                                                                                                  | Sedentary 30- to 75-year-old adults with T2DM and HbA1c levels of 6.5% to 11.0%.<br>N = 262 (RT = 73, AT = 72, CT = 76, CG = 41).                | Resistance training, aerobic training, and combined exercise consisting of aerobic and resistance exercises.<br>150 mins/ week, 3 days per week for 9 months.<br>Moderate intensity. | HbA1c ( $p < 0.05$ ) *<br>WC ( $p < 0.05$ ) *<br>FBG ( $p < 0.05$ ) *<br><br>BMI, LDL, HDL, SBP, DBP, TG               |
| Connors et. al, 2017 | To determine if an underwater treadmill walking program featuring gradual and progressive increases in walking speed and duration has a positive effect on glycaemic control, metabolic health, cardiovascular function, body composition, and leg strength in individuals with T2DM.<br>RCT, parallel group.<br>Laboratory setting.<br>USA. | Sedentary middle-aged adults with diagnosis of type 2 diabetes for a minimum of 2 years has a sedentary lifestyle.<br>N = 26 (IG = 13, CG = 13). | 12-week program of underwater treadmill walking<br>15 mins, 3x per week for 12 weeks<br>CG continued their usual treatment                                                           | HbA1c ( $p < 0.05$ ) *<br>WC ( $p < 0.05$ ) *<br>HDL ( $p < 0.05$ ) *<br>LDL ( $p < 0.05$ ) *<br><br>TG, DBP, SBP, TC  |



|                          |                                                                                                                                                                                                                                                                  |                                                                                                 |                                                                                                                                                                                                                                                                                    |                                                                                                                        |
|--------------------------|------------------------------------------------------------------------------------------------------------------------------------------------------------------------------------------------------------------------------------------------------------------|-------------------------------------------------------------------------------------------------|------------------------------------------------------------------------------------------------------------------------------------------------------------------------------------------------------------------------------------------------------------------------------------|------------------------------------------------------------------------------------------------------------------------|
| Emerenziani et. al, 2015 | To evaluate the effects of aerobic training intervention, based on heart rate at aerobic gas exchange threshold, on clinical and physiological parameters in obese elderly subjects with type 2 diabetes.<br>RCT, parallel group.<br>Clinical setting.<br>Italy. | Obese elderly subjects with T2DM<br>N = 30 (IG = 15, CG = 15).                                  | Aerobic training consisting of 5 mins warm-up, 30 mins aerobic training, and 5 mins cool down. CG had no exercise intervention.<br>Each session lasted 50 mins, 2x per month for 3-month.<br>Moderate intensity.                                                                   | HbA1c ( $p < 0.05$ ) *<br><br>BMI, HDL, LDL, TC, BMI                                                                   |
| Gordon et. al, 2008      | To investigate the effect of Hatha yoga and conventional physical training exercise intervention on clinical and biochemical parameters in patients with type 2 diabetes.<br>RCT, parallel group.<br>Clinical setting.<br>Jamaica.                               | People with type 2 diabetes mellitus, 40-70 years old<br>N = 231 (IG1 = 77, IG2 = 77, CG = 77)  | Aerobic exercise consisting of 15 mins of warm-up exercises, 30 mins of aerobic walking, 20 mins of body flexibility exercises, 20 mins of aerobic dance, 25 mins of games and 10 mins of warm-down exercises. CG had no exercise intervention.<br>3-4 times per week for 6 months | FBG ( $p < 0.05$ ) *<br>HbA1c ( $p < 0.05$ ) *<br>SBP ( $p < 0.05$ ) *<br>DBP ( $p < 0.05$ ) *<br><br>LDL, HDL         |
| Hangping et. al, 2019    | To evaluate the effects of a novel, low-volume, high-intensity Progressive Resistance Training (PRT) technique on blood glucose control in elderly Chinese patients with T2DM.<br>RCT, parallel group.<br>Clinical setting.<br>China.                            | People with diagnosis of type 2 Diabetes, aged 50 to 75 years.<br>N = 265 (IG = 165, CG = 100). | Supervised progressive resistance training. CG had no exercise intervention.<br>5–10 mins weekly.<br>High intensity.<br>6 months.                                                                                                                                                  | HDL ( $p < 0.05$ ) *<br>HbA1c ( $p < 0.05$ ) *<br>LDL ( $p < 0.05$ ) *<br>TC ( $p < 0.05$ ) *<br><br>FBG, TG, SBP, DBP |
| Hsieh et. al, 2018       | To investigate the effects of 12 weeks of resistance training on muscle function, physical performance, cardiometabolic risks, and QoL in older people with T2DM.                                                                                                | Participants aged 65 to 80 years with a diagnosis of T2DM.<br>N = 30 (IG = 15, CG = 15).        | Supervised resistance exercise. CG had no exercise intervention.<br>3 times per week for 12 weeks.<br>Moderate intensity.                                                                                                                                                          | SBP ( $p < 0.05$ ) *<br>WC ( $p < 0.05$ ) *<br>FBG ( $p < 0.05$ ) *<br>DBP ( $p < 0.05$ ) *<br>HbA1c ( $p < 0.05$ ) *  |

|                         |                                                                                                                                                                                               |                                                                                                                        |                                                                                                                                                                                                        |                                                                                            |
|-------------------------|-----------------------------------------------------------------------------------------------------------------------------------------------------------------------------------------------|------------------------------------------------------------------------------------------------------------------------|--------------------------------------------------------------------------------------------------------------------------------------------------------------------------------------------------------|--------------------------------------------------------------------------------------------|
|                         | RCT, parallel group.<br>Clinical setting.<br>Taiwan.                                                                                                                                          |                                                                                                                        |                                                                                                                                                                                                        | BMI, HDL, LDL,<br>TG, TC                                                                   |
| Huimin et. al,<br>2014  | To investigate the effects of aerobic exercise program on glucose control and BP in people with T2DM<br>RCT, parallel group<br>Clinical setting<br>Mozambique                                 | Participants aged between 40 and 70, diagnosed with type 2 diabetes<br>N = 41 (IG = 31, CG = 10)                       | Supervised aerobic exercises. CG had no exercise intervention.<br>45 min/session, 3–5times/week.<br>Moderate intensity<br>12 weeks                                                                     | FBG ( $p < 0.05$ ) *<br>SBP ( $p < 0.05$ ) *<br>DBP ( $p < 0.05$ ) *<br><br>WC, BMI, HbA1c |
| Lam et. al, 2008        | To assess the effect of tai chi on glycated haemoglobin, blood pressure and health status in adults with T2DM<br>RCT, parallel group<br>Community setting<br>Australia                        | Participants who were 30 years or over, and had a diagnosis of type 2 diabetes<br>N = 46 (IG = 24, CG = 22)            | Tai Chi. CG had no exercise intervention<br>Two sessions per week for 3 months, then once per week for 3 months<br>moderate intensity                                                                  | SBP, DBP, HbA1c,<br>TC, TG, BMI                                                            |
| Lambers et. al,<br>2008 | To investigate the influence of combined exercise training on indices of obesity, diabetes, and cardiovascular risk in adults with T2DM<br>RCT, parallel group<br>Clinical setting<br>Belgium | Participants who were 30 years or over, and had a diagnosis of type 2 diabetes<br>N = 46 (IG1 = 17, IG2 = 18, CG = 11) | Supervised combined exercise training including stretching, circuit training: walking, cycling, and stepping.<br>60 mins 3x per week, for 3 months<br>CG continued normal activities, without exercise | HbA1c ( $p < 0.05$ ) *<br>TC ( $p < 0.05$ ) *<br>HDL ( $p < 0.05$ ) *<br><br>LDL, TG, WC   |
| Plotnikoff et. al, 2010 | To investigate whether a home-based resistance training (RT) program could provide benefits to obese patients with type 2 diabetes                                                            | Participants who were obese and sedentary, and had a diagnosis of type 2 diabetes<br>N = 48 (IG = 27, CG = 21)         | Supervised prescribed resistance training<br>3 non-consecutive days per week, for 16-weeks.<br>Moderate intensity                                                                                      | HDL ( $p < 0.05$ ) *<br><br>BMI, HbA1c,<br>LDL, TG, TC, WC,                                |

|                           |                                                                                                                                                                                                                                 |                                                                              |                                                                                                                                                                    |                                                                                                                                 |
|---------------------------|---------------------------------------------------------------------------------------------------------------------------------------------------------------------------------------------------------------------------------|------------------------------------------------------------------------------|--------------------------------------------------------------------------------------------------------------------------------------------------------------------|---------------------------------------------------------------------------------------------------------------------------------|
|                           | RCT, parallel group<br>Home-based setting<br>Canada                                                                                                                                                                             |                                                                              | CG had no exercise intervention                                                                                                                                    | SBP, DBP, WHR,<br>FBG                                                                                                           |
| Ranasinghe et. al, 2021   | To examine the effects of aerobic training and resistance training compared to standard care on glycaemic control in south Asian Sri Lankan adults with type 2 diabetes<br>RCT, parallel group<br>Clinical setting<br>Sri Lanka | Adults aged 35-65 years and diagnosed with T2DM<br>N = 48 (IG = 27, CG = 21) | Supervised aerobic training and resistance training<br>75-min per session, 2 times per week for 12 weeks.<br>Moderate intensity<br>CG had no exercise intervention | FBG ( $p < 0.05$ ) *<br>HbA1c ( $p < 0.05$ ) *<br>TC ( $p < 0.05$ ) *<br>HDL ( $p < 0.05$ ) *<br><br>LDL, TG, SBP, DBP, BMI, WC |
| Shantakumari et. al, 2013 | To assess the effectiveness of yoga in the management of dyslipidaemia in patients with type 2 diabetes<br>RCT, parallel group<br>Clinical setting<br>India                                                                     | Adults with type 2 diabetes and dyslipidaemia<br>N = 100 (IG = 50, CG = 50)  | Yoga postures<br>30-35 min daily for 3 months<br>CG continued with their oral medications without yoga                                                             | WHR ( $p < 0.05$ ) *<br>TC ( $p < 0.05$ ) *<br>TG ( $p < 0.05$ ) *<br>LDL ( $p < 0.05$ ) *<br><br>HDL, FBG                      |
| Shenoy et. al, 2009       | To evaluate the effects of progressive resistance training and aerobic exercise on glycaemic control, blood pressure, heart rate, muscle strength and control of T2DM<br>RCT, parallel group<br>Clinical setting<br>India       | Inactive adults with type 2 diabetes<br>N = 20 (IG = 10, CG = 10)            | Progressive resistance training, aerobics, and control group without any exercise intervention.<br>2x per week for 16 weeks<br>Moderate-high intensity             | HbA1c ( $p < 0.05$ ) *<br>FBG ( $p < 0.05$ ) *<br>SBP ( $p < 0.05$ ) *<br>DBP ( $p < 0.05$ ) *<br><br>BMI, WC                   |

|                          |                                                                                                                                                                                                                                                                                                   |                                                                                                                           |                                                                                                                                                                                                                                                                                                                                        |                                                                                                                                                                                        |
|--------------------------|---------------------------------------------------------------------------------------------------------------------------------------------------------------------------------------------------------------------------------------------------------------------------------------------------|---------------------------------------------------------------------------------------------------------------------------|----------------------------------------------------------------------------------------------------------------------------------------------------------------------------------------------------------------------------------------------------------------------------------------------------------------------------------------|----------------------------------------------------------------------------------------------------------------------------------------------------------------------------------------|
| Sigal et. al, 2007       | To determine the effects of aerobic training alone, resistance training alone and combined exercise training on glycated haemoglobin in patients with T2DM<br>RCT, parallel group<br>Community setting<br>Canada                                                                                  | People with type 2 diabetes and has HbA1c between values of 6.6%-99.9%<br>N = 251 (IG1 = 60, IG2 = 64, IG3 = 64, CG = 63) | Supervised aerobic training on treadmills or bicycle ergometers. The resistance training group performed 7 different exercises on weight machines. The combined exercise training group did the full aerobic training program plus the full resistance training program. CG had no exercise intervention.<br>3x per week, for 6 months | HbA1c ( $p < 0.05$ ) *<br><br>BMI, WC, SBP, DBP, HDL, LDL, TG, TC                                                                                                                      |
| Sijie et. al, 2018       | To investigate the pleiotropic effects of supervised exercise training at maximal fat oxidation in intensity on body composition, lipid profile, glycaemic control, insulin sensitivity and serum adipokine levels in older women with T2DM<br>RCT, parallel group<br>Laboratory setting<br>China | Women with type 2 diabetes, aged 60-69 years<br>N = 32 (IG = 16, CG = 16)                                                 | FATmax exercise training involving stretches, 20-40 min of walking or running<br>20-60 min per day, 3 times per week for 12 weeks<br>High intensity                                                                                                                                                                                    | BMI ( $p < 0.05$ ) *<br>WC ( $p < 0.05$ ) *<br>WHR ( $p < 0.05$ ) *<br>FBG ( $p < 0.05$ ) *<br>LDL ( $p < 0.05$ ) *<br>TG ( $p < 0.05$ ) *<br>TC ( $p < 0.05$ ) *<br><br>HDL, SBP, DBP |
| Tudor-Locke et. al, 2004 | To assess the impact of a PA intervention for people with T2DM<br>RCT, parallel group<br>community setting<br>Canada                                                                                                                                                                              | People with type 2 diabetes, aged 40-60 years<br>N = 47 (IG = 24, CG = 23)                                                | Use of pedometers to measure steps per day<br>16 weeks<br>Not specified                                                                                                                                                                                                                                                                | WC ( $p < 0.05$ ) *<br><br>FBG, HDL, LDL, TG, TC, SBP, DBP                                                                                                                             |

|                        |                                                                                                                                                                                                                  |                                                                                                      |                                                                                                                                                                                                                                                                                          |                                                                                                                                           |
|------------------------|------------------------------------------------------------------------------------------------------------------------------------------------------------------------------------------------------------------|------------------------------------------------------------------------------------------------------|------------------------------------------------------------------------------------------------------------------------------------------------------------------------------------------------------------------------------------------------------------------------------------------|-------------------------------------------------------------------------------------------------------------------------------------------|
| Vancea et. al,<br>2009 | To compare the influence of guided and structured physical exercise program on glycaemic control and body composition in people with T2DM.<br>RCT, parallel group<br>clinical setting<br>Brazil                  | People with type 2 diabetes, aged 40-65 years<br>N = 47 (IG1 = 14, IG2 = 9, CG = 17)                 | Exercise group 1 did 3 workout sessions per week consisting of warm-up (5 mins): stretching exercises; 2) main exercises (30 mins): walking on the treadmill, and 3) back to relaxation (10 mins). Group 2 repeated same exercise but had it for 5 workout sessions per week<br>20 weeks | BMI ( $p < 0.05$ ) *<br>FBG ( $p < 0.05$ ) *<br><br>DBP, SBP, HbA1c, HDL, LDL, WC                                                         |
| Wang et. al,<br>2019   | To compare the effects of aerobic exercise alone and resistance training alone as well as the combination of both on glycaemic control in people with T2DM.<br>RCT, parallel group<br>Community setting<br>China | People with type 2 diabetes, aged 18-85 years<br>N = 794 (IG1 = 200, IG2 = 199, IG3 = 198, CG = 197) | Group 1 had health literacy intervention. Group 2 walked 30-70 min, 3 to 5 days a week. Group 3 had both literacy and walking intervention. CG had no exercise intervention.<br>24 months                                                                                                | LDL ( $p < 0.05$ ) *<br><br>HDL, SBP, DBP, WC, HbA1c                                                                                      |
| Yavari et. al,<br>2012 | To evaluate the effectiveness of health literacy and exercise-focused interventions on clinical outcomes among Chinese patients with T2DM.<br>RCT, parallel group<br>Clinical setting<br>Iran                    | People with type 2 diabetes, and were inactive<br>N = 60 (IG1 = 15, IG2 = 15, IG3 = 15, CG = 15)     | Group 1 performed resistance exercise; Group 2 performed aerobics Group 3 did the aerobic exercise plus resistance training. CG had no exercise intervention<br>52 weeks<br>20-60 mins per session, 3 times a week for 12 months.                                                        | HbA1c ( $p < 0.05$ ) *<br>FBG ( $p < 0.05$ ) *<br>SBP ( $p < 0.05$ ) *<br>DBP ( $p < 0.05$ ) *<br>TG ( $p < 0.05$ ) *<br><br>WC, HDL, LDL |

\* Significant difference between intervention group and control group following exercise intervention, FBG fasting blood glucose, SBP systolic blood pressure, DBP diastolic blood pressure, WC waist circumference, TG triglycerides, TC total cholesterol, WHR waist-to-hip ratio, HbA1c glycated haemoglobin, BMI body mass media, HDL high density lipoprotein, LDL low density lipoprotein, BMI body mass index, IG intervention group, CG control group.
